# Supplementary material for: The Impact of Nonmotor Symptoms on Health-Related Quality of Life in Parkinson’s Disease: A Network Analysis Approach
Source: MDPI journal article supplement (doi:10.3390/jcm12072573), 2023-03-29
Supplement: s1 [file s1]

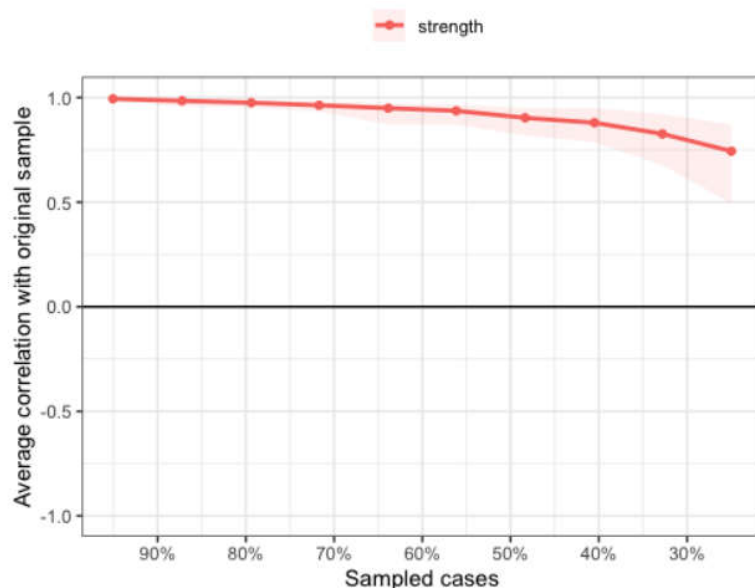

**Figure S1.** Case-dropping bootstrap strength of the Nonmotor Symptoms Scale in Parkinson's disease (NMSS) and Parkinson's Disease Questionnaire 39 (PDQ-39) summary index (number of bootstraps = 1000). Correlations of the strength centrality measure between the original sample and those of the subsamples with increasingly higher percentages of dropout cases were calculated. The correlation stability coefficient (CS coefficient) represents the maximum proportion of cases that can be dropped to retain a correlation of at least 0.70 with the original strength in at least 95% of the samples. The 95% confidence interval of the correlation is indicated. The case-dropping bootstrap procedure showed that the CS coefficient of the node strength (CS (cor = 0.7) = 0.67) remained stable.

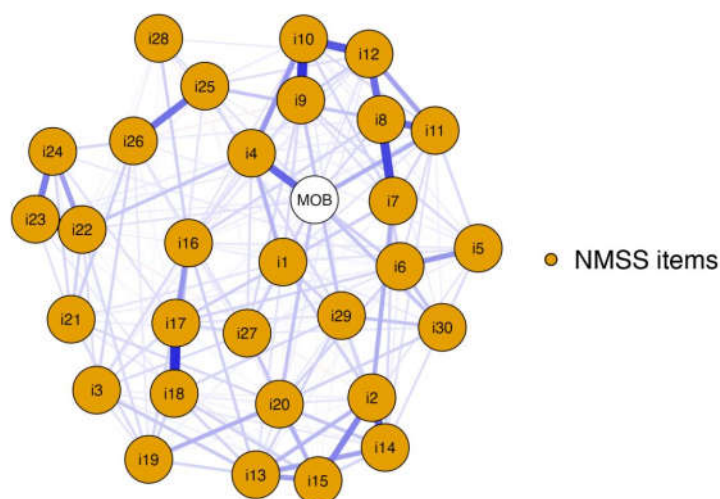

**Figure S2:** Network structure of the NMSS and MOB. The node *MOB* displays the PDQ-39 mobility subscale, and nodes *i1*–*i30* display the items included in the NMSS (orange). The thickness of the edges indicates the strengths of the correlations between these nodes. Item 1: light headedness; item 2: fainting; item 3: daytime sleepiness; item 4: fatigue; item 5: sleep initiation; item 6: restless legs; item 7: loss of interest; item 8: lack of motivation; item 9: feeling nervous; item 10: feeling sad; item 11: flat mood; item 12: anhedonia; item 13: hallucinations; item 14: delusions; item 15: diplopia; item 16: concentration; item 17: forgetfulness; item 18: forget to do things; item 19: sialorrhea; item 20: dysphagia; item 21: constipation; item 22: urgency; item 23: frequency; item 24: nocturia; item 25: interest; item 26: problems having sex; item 27: pain; item 28: taste/smell; item 29: weight change;

and item 30: hyperhidrosis. NMSS: Nonmotor Symptoms Scale in Parkinson's disease. PDQ-39: Parkinson's Disease Questionnaire 39. MOB: mobility subscale.

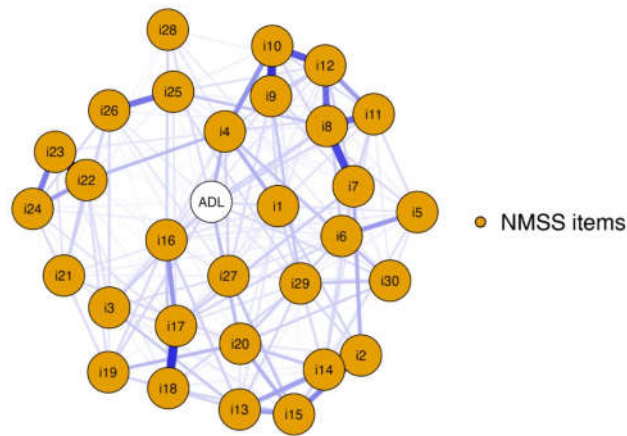

**Figure S3:** Network structure of the NMSS and ADL. The node *ADL* displays the PDQ-39 activities of daily living subscale, and nodes *i1–i30* display the items included in the NMSS (orange). The thickness of the edges indicates the strengths of the correlations between these nodes. Item 1: light headedness; item 2: fainting; item 3: daytime sleepiness; item 4: fatigue; item 5: sleep initiation; item 6: restless legs; item 7: loss of interest; item 8: lack of motivation; item 9: feeling nervous; item 10: feeling sad; item 11: flat mood; item 12: anhedonia; item 13: hallucinations; item 14: delusions; item 15: diplopia; item 16: concentration; item 17: forgetfulness; item 18: forget to do things; item 19: sialorrhea; item 20: dysphagia; item 21: constipation; item 22: urgency; item 23: frequency; item 24: nocturia; item 25: interest; item 26: problems having sex; item 27: pain; item 28: taste/smell; item 29: weight change; and item 30: hyperhidrosis. NMSS: Nonmotor Symptoms Scale in Parkinson's disease. PDQ-39: Parkinson's Disease Questionnaire 39. ADL: activities of daily living subscale.

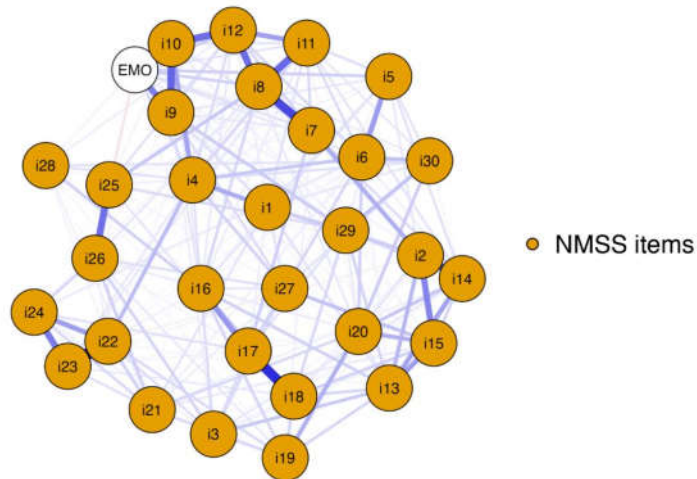

**Figure S4:** Network structure of the NMSS and EMO. The node *EMO* displays the PDQ-39 emotional well-being subscale, and nodes *i1–i30* display the items included in the NMSS (orange). The thickness of the edges indicates the strengths of the correlations between these nodes. Item 1: light headedness; item 2: fainting; item 3: daytime sleepiness; item 4: fatigue; item 5: sleep initiation; item 6: restless legs; item 7: loss of interest; item 8: lack of motivation; item 9: feeling nervous; item 10: feeling sad; item 11: flat mood; item 12: anhedonia; item 13: hallucinations; item 14: delusions; item 15: diplopia; item 16: concentration; item 17: forgetfulness; item 18: forget to do things; item 19: sialorrhea; item 20: dysphagia; item 21: constipation; item 22: urgency; item 23: frequency; item 24: nocturia; item 25: interest; item 26: problems having sex; item 27: pain; item 28: taste/smell; item 29:

weight change; and item 30: hyperhidrosis. NMSS: Nonmotor Symptoms Scale in Parkinson's disease. PDQ-39: Parkinson's Disease Questionnaire 39. EMO: emotional well-being subscale.

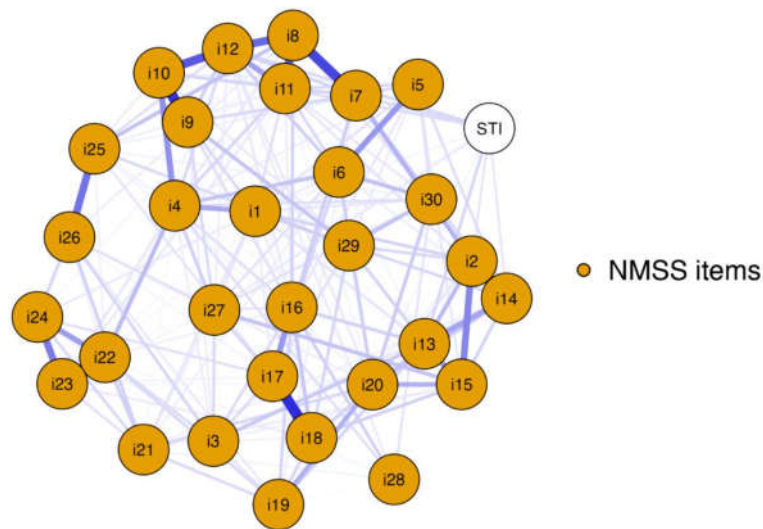

**Figure S5:** Network structure of the NMSS and STI. The node *STI* displays the PDQ-39 stigma subscale, and nodes *i1–i30* display the items included in the NMSS (orange). The thickness of the edges indicates the strengths of the correlations between these nodes. Item 1: light headedness; item 2: fainting; item 3: daytime sleepiness; item 4: fatigue; item 5: sleep initiation; item 6: restless legs; item 7: loss of interest; item 8: lack of motivation; item 9: feeling nervous; item 10: feeling sad; item 11: flat mood; item 12: anhedonia; item 13: hallucinations; item 14: delusions; item 15: diplopia; item 16: concentration; item 17: forgetfulness; item 18: forget to do things; item 19: sialorrhea; item 20: dysphagia; item 21: constipation; item 22: urgency; item 23: frequency; item 24: nocturia; item 25: interest; item 26: problems having sex; item 27: pain; item 28: taste/smell; item 29: weight change; and item 30: hyperhidrosis. NMSS: Nonmotor Symptoms Scale in Parkinson's disease. PDQ-39: Parkinson's Disease Questionnaire 39. STI: stigma subscale.

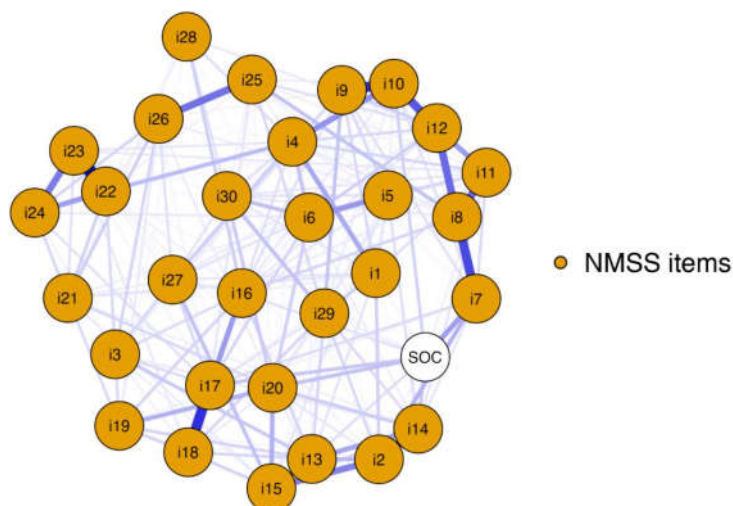

**Figure S6:** Network structure of the NMSS and SOC. The node *SOC* displays the PDQ-39 social support subscale, and nodes *i1–i30* display the items included in the NMSS (orange). The thickness of the edges indicates the strengths of the correlations between these nodes. Item 1: light headedness; item 2: fainting; item 3: daytime sleepiness; item 4: fatigue; item 5: sleep initiation; item 6: restless legs; item 7: loss of interest; item 8: lack of motivation; item 9: feeling nervous; item 10: feeling sad; item 11: flat mood; item 12: anhedonia; item 13: hallucinations; item 14: delusions; item

15: diplopia; item 16: concentration; item 17: forgetfulness; item 18: forget to do things; item 19: sialorrhea; item 20: dysphagia; item 21: constipation; item 22: urgency; item 23: frequency; item 24: nocturia; item 25: interest; item 26: problems having sex; item 27: pain; item 28: taste/smell; item 29: weight change; and item 30: hyperhidrosis. NMSS: Nonmotor Symptoms Scale in Parkinson's disease. PDQ-39: Parkinson's Disease Questionnaire 39. SOC: social support subscale.

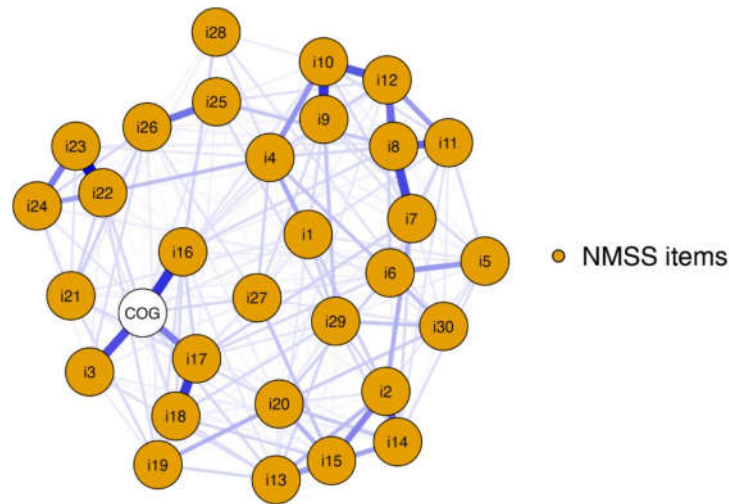

**Figure S7:** Network structure of the NMSS and COG. The node COG displays the PDQ-39 cognition subscale, and nodes *i1*–*i30* display the items included in the NMSS (orange). The thickness of the edges indicates the strengths of the correlations between these nodes. Item 1: light headedness; item 2: fainting; item 3: daytime sleepiness; item 4: fatigue; item 5: sleep initiation; item 6: restless legs; item 7: loss of interest; item 8: lack of motivation; item 9: feeling nervous; item 10: feeling sad; item 11: flat mood; item 12: anhedonia; item 13: hallucinations; item 14: delusions; item 15: diplopia; item 16: concentration; item 17: forgetfulness; item 18: forget to do things; item 19: sialorrhea; item 20: dysphagia; item 21: constipation; item 22: urgency; item 23: frequency; item 24: nocturia; item 25: interest; item 26: problems having sex; item 27: pain; item 28: taste/smell; item 29: weight change; and item 30: hyperhidrosis. NMSS: Nonmotor Symptoms Scale in Parkinson's disease. PDQ-39: Parkinson's Disease Questionnaire 39. COG: cognition subscale.

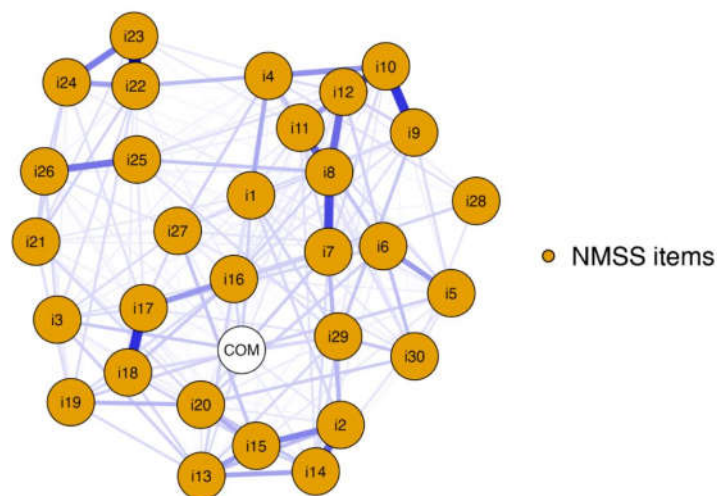

**Figure S8:** Network structure of the NMSS and COM. The node COM displays the PDQ-39 communication subscale, and nodes *i1*–*i30* display the items included in the NMSS (orange). The thickness of the edges indicates the strengths of the correlations between these nodes. Item 1: light headedness; item 2: fainting; item 3: daytime sleepiness; item 4: fatigue; item 5: sleep initiation; item 6:

restless legs; item 7: loss of interest; item 8: lack of motivation; item 9: feeling nervous; item 10: feeling sad; item 11: flat mood; item 12: anhedonia; item 13: hallucinations; item 14: delusions; item 15: diplopia; item 16: concentration; item 17: forgetfulness; item 18: forget to do things; item 19: sialorrhea; item 20: dysphagia; item 21: constipation; item 22: urgency; item 23: frequency; item 24: nocturia; item 25: interest; item 26: problems having sex; item 27: pain; item 28: taste/smell; item 29: weight change; and item 30: hyperhidrosis. NMSS: Nonmotor Symptoms Scale in Parkinson's disease. PDQ-39: Parkinson's Disease Questionnaire 39. COM: communication subscale.

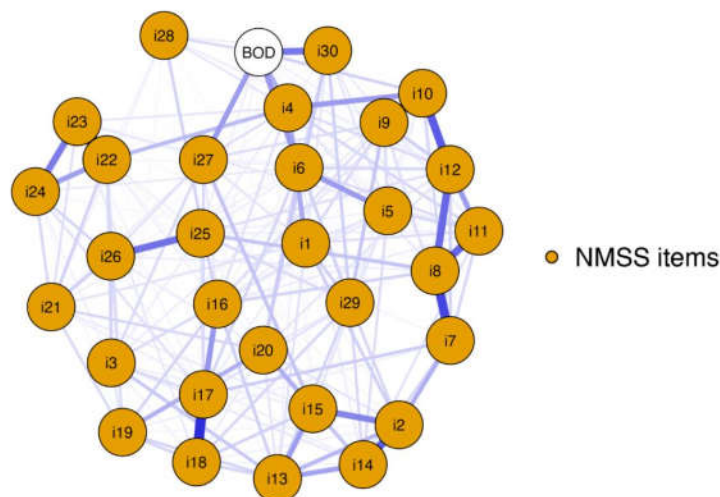

**Figure S9:** Network structure of the NMSS and BOD. The node *BOD* displays the PDQ-39 bodily discomfort subscale, and nodes *i1*–*i30* display the items included in the NMSS (orange). The thickness of the edges indicates the strengths of the correlations between these nodes. Item 1: light headedness; item 2: fainting; item 3: daytime sleepiness; item 4: fatigue; item 5: sleep initiation; item 6: restless legs; item 7: loss of interest; item 8: lack of motivation; item 9: feeling nervous; item 10: feeling sad; item 11: flat mood; item 12: anhedonia; item 13: hallucinations; item 14: delusions; item 15: diplopia; item 16: concentration; item 17: forgetfulness; item 18: forget to do things; item 19: sialorrhea; item 20: dysphagia; item 21: constipation; item 22: urgency; item 23: frequency; item 24: nocturia; item 25: interest; item 26: problems having sex; item 27: pain; item 28: taste/smell; item 29: weight change; and item 30: hyperhidrosis. NMSS: Nonmotor Symptoms Scale in Parkinson's disease. PDQ-39: Parkinson's Disease Questionnaire 39. BOD: bodily discomfort subscale.

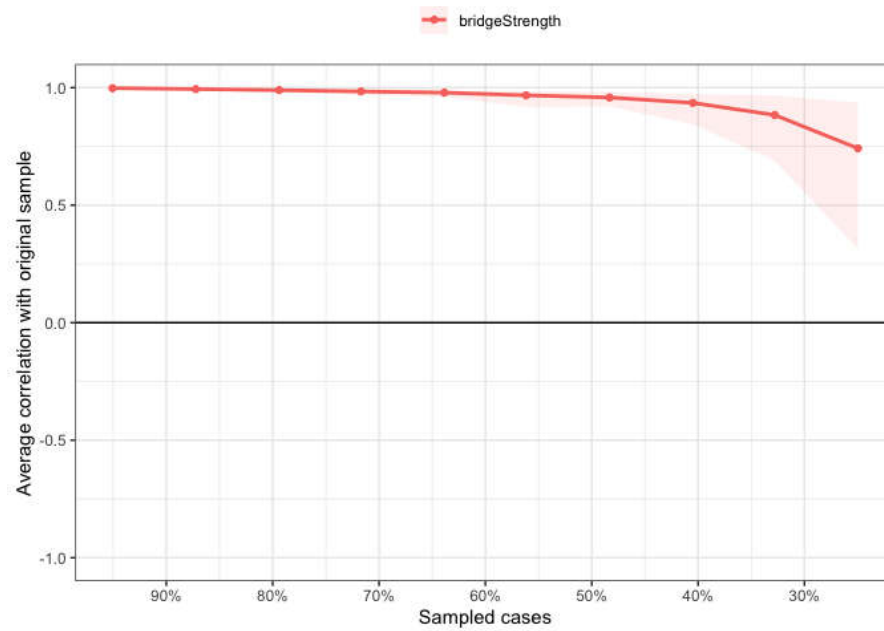

**Figure S10:** Case-dropping bootstrap bridge strength of the NMSS and PDQ-39 subscales (number of bootstraps = 1000). The correlations of the bridge strength centrality measure between the original sample and the subsamples with increasingly higher percentages of dropout cases were calculated. The correlation stability coefficient (CS coefficient) represents the maximum proportion of cases that can be dropped to retain a correlation of at least 0.70 with the original bridge strength in at least 95% of the samples. The 95% confidence interval of the correlation is indicated. The case-dropping bootstrap procedure showed that the CS coefficient of bridge strength ( $CS(\text{cor} = 0.7) = 0.67$ ) remained stable. NMSS: Nonmotor Symptoms Scale in Parkinson's disease. PDQ-39: Parkinson's Disease Questionnaire 39.

**Table S1:** Network analysis of the PDQ-39 summary index.

| Node | Strength | Predictability | Edge weight |
|------|----------|----------------|-------------|
| PDQ  | 2.996    | 0.528          | /           |
| i1   | -0.567   | 0.262          | 0.067       |
| i2   | 0.662    | 0.411          | 0.000       |
| i3   | -1.072   | 0.185          | 0.086       |
| i4   | 0.750    | 0.470          | 0.184       |
| i5   | -0.962   | 0.204          | 0.059       |
| i6   | -0.009   | 0.287          | 0.066       |
| i7   | 0.151    | 0.477          | 0.007       |
| i8   | 1.193    | 0.608          | 0.066       |
| i9   | 0.082    | 0.427          | 0.040       |
| i10  | 0.965    | 0.586          | 0.096       |
| i11  | 0.577    | 0.496          | 0.099       |
| i12  | 1.272    | 0.624          | 0.063       |
| i13  | 0.312    | 0.401          | 0.025       |
| i14  | 0.472    | 0.398          | 0.000       |
| i15  | 0.103    | 0.285          | 0.000       |
| i16  | 0.397    | 0.394          | 0.119       |
| i17  | 0.664    | 0.370          | 0.037       |
| i18  | 0.002    | 0.395          | 0.000       |
| i19  | -1.069   | 0.197          | 0.006       |
| i20  | 0.154    | 0.282          | 0.106       |
| i21  | -1.121   | 0.185          | 0.010       |

|     |        |       |       |
|-----|--------|-------|-------|
| i22 | 0.737  | 0.467 | 0.048 |
| i23 | 0.067  | 0.448 | 0.011 |
| i24 | -0.857 | 0.272 | 0.000 |
| i25 | -0.738 | 0.247 | 0.023 |
| i26 | -0.766 | 0.197 | 0.000 |
| i27 | -0.714 | 0.205 | 0.107 |
| i28 | -2.440 | 0.087 | 0.072 |
| i29 | -0.236 | 0.279 | 0.042 |
| i30 | -1.004 | 0.185 | 0.092 |

The strength centrality measures and predictability are given nodewise for the PDQ-39 summary index (*PDQ*) and the items of the NMSS (*i1–i30*). The edge weights refer to the associations between the PDQ-39 summary index (*PDQ*) and each item of the NMSS (*i1–i30*). Item 1: light headedness; item 2: fainting; item 3: daytime sleepiness; item 4: fatigue; item 5: sleep initiation; item 6: restless legs; item 7: loss of interest; item 8: lack of motivation; item 9: feeling nervous; item 10: feeling sad; item 11: flat mood; item 12: anhedonia; item 13: hallucinations; item 14: delusions; item 15: diplopia; item 16: concentration; item 17: forgetfulness; item 18: forget to do things; item 19: sialorrhea; item 20: dysphagia; item 21: constipation; item 22: urgency; item 23: frequency; item 24: nocturia; item 25: interest; item 26: problems having sex; item 27: pain; item 28: taste/smell; item 29: weight change; and item 30: hyperhidrosis. NMSS: Nonmotor Symptoms Scale in Parkinson’s disease. PDQ-39: Parkinson’s Disease Questionnaire 39.

**Table S2:** Network characteristics of the PDQ-39 subscales.

| Network PDQ-39 subscale | Nonzero edges | Predictability sub-scale | CS strength |
|-------------------------|---------------|--------------------------|-------------|
| MOB                     | 231 of 465    | 0.385                    | 0.672       |
| ADL                     | 228 of 465    | 0.252                    | 0.595       |
| EMO                     | 233 of 465    | 0.527                    | 0.672       |
| STI                     | 226 of 465    | 0.143                    | 0.672       |
| SOC                     | 234 of 465    | 0.239                    | 0.595       |
| COG                     | 229 of 465    | 0.501                    | 0.672       |
| COM                     | 229 of 465    | 0.222                    | 0.672       |
| BOD                     | 228 of 465    | 0.403                    | 0.595       |

For every network in the eight subscales, the number of nonzero edges, predictability of each node representing the PDQ-39 subscale, and correlation stability coefficient (CS coefficient) of the strength centrality measure are given separately (number of bootstraps = 1000). The CS coefficient represents the maximum proportion of cases that can be dropped to retain a correlation of at least 0.70 with the original strength in at least 95% of the samples. CS coefficients > 0.5 indicate that the networks are stable. PDQ-39 subscale coding: MOB, mobility; ADL, activities of daily living; EMO, emotional well-being; STI, stigma; SOC, social support; COG, cognition; COM, communication; BOD, bodily discomfort. PDQ-39: Parkinson’s Disease Questionnaire 39.

**Table S3:** Network analyses of the PDQ-39 subscales.

|                 | MOB    |       | ADL    |       | EMO    |        | STI    |       | SOC    |       | COG    |       | COM    |       | BOD    |        |
|-----------------|--------|-------|--------|-------|--------|--------|--------|-------|--------|-------|--------|-------|--------|-------|--------|--------|
| PDQ-39 subscale | 1.052  | /     | 0.316  | /     | 1.476  | /      | -1.885 | /     | -0.497 | /     | 2.276  | /     | 0.251  | /     | 0.732  | /      |
| i1              | -0.552 | 0.050 | -0.427 | 0.057 | -0.564 | 0.030  | -0.356 | 0.017 | -0.486 | 0.018 | -0.522 | 0.040 | -0.402 | 0.078 | -0.549 | 0.000  |
| i2              | 0.758  | 0.000 | 0.352  | 0.000 | 0.760  | 0.000  | 0.528  | 0.040 | 0.689  | 0.017 | 0.714  | 0.000 | 0.401  | 0.039 | 0.661  | -0.009 |
| i3              | -1.120 | 0.022 | -1.014 | 0.078 | -1.136 | 0.000  | -0.954 | 0.000 | -1.094 | 0.005 | -1.167 | 0.293 | -0.995 | 0.091 | -1.141 | 0.000  |
| i4              | 1.366  | 0.251 | 1.347  | 0.121 | 1.269  | 0.061  | 1.177  | 0.000 | 1.294  | 0.000 | 1.138  | 0.021 | 1.227  | 0.000 | 1.278  | 0.126  |
| i5              | -1.041 | 0.000 | -0.944 | 0.035 | -1.086 | 0.080  | -0.850 | 0.000 | -1.005 | 0.000 | -0.964 | 0.012 | -0.855 | 0.080 | -1.064 | 0.013  |
| i6              | 0.092  | 0.051 | 0.162  | 0.000 | 0.087  | 0.040  | 0.209  | 0.000 | 0.132  | 0.000 | 0.097  | 0.003 | 0.161  | 0.000 | 0.262  | 0.169  |
| i7              | 0.154  | 0.000 | 0.209  | 0.000 | 0.112  | 0.051  | 0.432  | 0.060 | 0.497  | 0.157 | 0.143  | 0.000 | 0.394  | 0.083 | 0.182  | 0.000  |
| i8              | 1.421  | 0.062 | 1.603  | 0.071 | 1.421  | 0.076  | 1.386  | 0.000 | 1.411  | 0.007 | 1.309  | 0.003 | 1.459  | 0.000 | 1.436  | 0.000  |
| i9              | 0.216  | 0.000 | 0.090  | 0.003 | 0.130  | 0.210  | 0.155  | 0.000 | 0.192  | 0.000 | 0.150  | 0.000 | 0.071  | 0.000 | 0.159  | 0.005  |
| i10             | 1.174  | 0.009 | 1.285  | 0.000 | 1.209  | 0.276  | 1.220  | 0.000 | 1.356  | 0.075 | 1.132  | 0.046 | 1.281  | 0.000 | 1.328  | 0.075  |
| i11             | 0.835  | 0.133 | 0.998  | 0.069 | 0.740  | 0.044  | 1.042  | 0.056 | 0.860  | 0.029 | 0.763  | 0.000 | 0.906  | 0.008 | 0.846  | 0.011  |
| i12             | 1.589  | 0.043 | 1.693  | 0.000 | 1.499  | 0.081  | 1.809  | 0.064 | 1.622  | 0.000 | 1.508  | 0.000 | 1.797  | 0.037 | 1.642  | 0.023  |
| i13             | 0.369  | 0.000 | 0.404  | 0.000 | 0.354  | 0.000  | 0.630  | 0.067 | 0.467  | 0.056 | 0.216  | 0.067 | 0.460  | 0.056 | 0.386  | 0.000  |
| i14             | 0.520  | 0.000 | 0.568  | 0.000 | 0.493  | 0.024  | 0.677  | 0.039 | 0.668  | 0.092 | 0.478  | 0.000 | 0.569  | 0.032 | 0.547  | 0.000  |
| i15             | 0.094  | 0.013 | 0.142  | 0.011 | 0.083  | 0.000  | 0.173  | 0.000 | 0.114  | 0.000 | 0.084  | 0.000 | 0.112  | 0.000 | 0.105  | 0.000  |
| i16             | 0.699  | 0.018 | 0.783  | 0.028 | 0.653  | 0.015  | 0.764  | 0.000 | 0.813  | 0.050 | 0.490  | 0.336 | 0.847  | 0.069 | 0.739  | 0.020  |
| i17             | 0.846  | 0.000 | 0.876  | 0.000 | 0.827  | 0.000  | 0.886  | 0.007 | 0.996  | 0.091 | 0.520  | 0.216 | 0.873  | 0.009 | 0.852  | 0.000  |
| i18             | -0.033 | 0.000 | 0.004  | 0.000 | -0.048 | 0.007  | 0.062  | 0.000 | -0.033 | 0.000 | -0.167 | 0.056 | 0.044  | 0.033 | -0.027 | 0.000  |
| i19             | -1.229 | 0.000 | -1.177 | 0.067 | -1.233 | 0.000  | -1.072 | 0.000 | -1.213 | 0.000 | -1.195 | 0.010 | -1.158 | 0.078 | -1.255 | 0.000  |
| i20             | 0.344  | 0.100 | 0.492  | 0.110 | 0.309  | 0.014  | 0.446  | 0.017 | 0.507  | 0.099 | 0.264  | 0.039 | 0.419  | 0.055 | 0.333  | 0.000  |
| i21             | -1.283 | 0.000 | -1.331 | 0.000 | -1.283 | 0.000  | -1.121 | 0.000 | -1.247 | 0.003 | -1.185 | 0.009 | -1.287 | 0.024 | -1.315 | 0.000  |
| i22             | 0.924  | 0.045 | 0.727  | 0.000 | 0.906  | 0.000  | 0.781  | 0.000 | 0.945  | 0.016 | 0.795  | 0.069 | 0.751  | 0.000 | 0.873  | 0.000  |
| i23             | 0.062  | 0.028 | 0.118  | 0.008 | 0.070  | 0.000  | 0.178  | 0.006 | 0.101  | 0.000 | 0.058  | 0.000 | 0.121  | 0.005 | 0.089  | 0.000  |
| i24             | -1.017 | 0.000 | -0.975 | 0.016 | -1.030 | 0.000  | -0.847 | 0.000 | -0.989 | 0.000 | -0.957 | 0.000 | -0.999 | 0.000 | -1.032 | 0.000  |
| i25             | -0.839 | 0.000 | -0.819 | 0.000 | -0.839 | 0.040  | -0.671 | 0.000 | -0.807 | 0.000 | -0.783 | 0.043 | -0.815 | 0.000 | -0.817 | 0.028  |
| i26             | -0.837 | 0.030 | -1.058 | 0.035 | -0.540 | -0.041 | -0.914 | 0.000 | -0.860 | 0.000 | -0.827 | 0.009 | -1.063 | 0.026 | -0.960 | 0.000  |
| i27             | -0.632 | 0.081 | -0.587 | 0.028 | -0.650 | 0.008  | -0.389 | 0.036 | -0.593 | 0.008 | -0.701 | 0.068 | -0.592 | 0.027 | -0.504 | 0.162  |
| i28             | -2.744 | 0.023 | -2.820 | 0.059 | -2.726 | 0.019  | -2.584 | 0.000 | -2.742 | 0.000 | -2.582 | 0.005 | -2.920 | 0.000 | -2.785 | 0.061  |
| i29             | -0.220 | 0.011 | -0.111 | 0.040 | -0.277 | 0.024  | -0.102 | 0.000 | -0.159 | 0.030 | -0.208 | 0.000 | -0.097 | 0.054 | -0.179 | 0.075  |
| i30             | -0.969 | 0.097 | -0.906 | 0.061 | -0.985 | 0.017  | -0.809 | 0.000 | -0.936 | 0.000 | -0.880 | 0.000 | -0.961 | 0.000 | -0.824 | 0.220  |

Strength centrality measures of the eight network analyses of the PDQ-39 subscales are given node-wise for the subscale variable (*MOB, ADL, EMO, STI, SOC, COG, COM, and BOD*) and the items of the NMSS (*i1–i30*). Edge weights refer to the associations between the PDQ-39 subscale variable and each of the items of the NMSS (*i1–i30*). Item 1: light headedness; item 2: fainting; item 3: daytime sleepiness; item 4: fatigue; item 5: sleep initiation; item 6: restless legs; item 7: loss of interest; item 8: lack of motivation; item 9: feeling nervous; item 10: feeling sad; item 11: flat mood; item 12: anhedonia; item 13: hallucinations; item 14: delusions; item 15: diplopia; item 16: concentration; item 17: forgetfulness; item 18: forget to do things; item 19: sialorrhea; item 20: dysphagia; item 21: constipation; item 22: urgency; item 23: frequency; item 24: nocturia; item 25: interest; item 26: problems having sex; item 27: pain; item 28: taste/smell; item 29: weight change; and item 30: hyperhidrosis. *MOB*, mobility; *ADL*, activities of daily living; *EMO*, emotional well-being; *STI*, stigma; *SOC*, social support; *COG*, cognition; *COM*, communication; *BOD*, bodily discomfort. PDQ-39: Parkinson's Disease Questionnaire 39. NMSS: Non-Motor Symptoms Scale in Parkinson's disease.

**Table S4.** Affiliations of the collaborators of the COPPADIS Study Group.

| Name (Last Name, First Name) | Location                                                                                    | Role                 | Contribution                                                                    |
|------------------------------|---------------------------------------------------------------------------------------------|----------------------|---------------------------------------------------------------------------------|
| Astrid Adarmes, Daniela      | Hospital Universitario Virgen del Rocío, Sevilla, Spain                                     | Site investigator    | Evaluation of participants and/or data management                               |
| Almeria, Marta               | Hospital Universitari Mutua de Terrassa, Terrassa, Barcelona, Spain                         | Site investigator    | Neuropsychologist; evaluation of participants                                   |
| Alonso Losada, Maria Gema    | Hospital Álvaro Cunqueiro, Complejo Hospitalario Universitario de Vigo (CHUVI), Vigo, Spain | Site investigator/PI | Coordination at the center<br>Evaluation of participants and/or data management |
| Alonso Cánovas, Araceli      | Hospital Universitario Ramón y Cajal, Madrid, Spain                                         | Site investigator    | Evaluation of participants and/or data management                               |
| Alonso Frech, Fernando       | Hospital Universitario Clínico San Carlos, Madrid, Spain                                    | Site investigator    | Evaluation of participants and/or data management                               |
| Alonso Redondo, Ruben        | Hospital Universitario Lucus Augusti (HULA), Lugo, Spain                                    | Site investigator/PI | Coordination at the center<br>Evaluation of participants and/or data management |
| Aneiros Díaz, Ángel          | Complejo Hospitalario Universitario de Ferrol (CHUF), Ferrol, A Coruña, Spain               | Site investigator/PI | Coordination at the center<br>Evaluation of participants and/or data management |
| Álvarez, Ignacio             | Hospital Universitari Mutua de Terrassa, Terrassa, Barcelona, Spain                         | Site investigator    | Evaluation of participants and/or data management                               |
| Álvarez Sauco, María         | Hospital General Universitario de Elche, Elche, Spain                                       | Site investigator/PI | Coordination at the center<br>Evaluation of participants and/or data management |
| Arnáiz, Sandra               | Complejo Asistencial Universitario de Burgos, Burgos, Spain                                 | Site investigator    | Evaluation of participants and/or data management                               |
| Arribas, Sonia               | Hospital Universitari Mutua de Terrassa, Terrassa, Barcelona, Spain                         | Site investigator    | Neuropsychologist; evaluation of participants                                   |
| Ascunce Vidondo, Arancha     | Complejo Hospitalario de Navarra, Pamplona, Spain                                           | Site investigator    | Evaluation of participants and/or data management                               |
| Aguilar, Miquel              | Hospital Universitari Mutua de Terrassa, Terrassa, Barcelona, Spain                         | Site investigator    | Evaluation of participants and/or data management                               |

|                                  |                                                                                                           |                      |                                                                                 |
|----------------------------------|-----------------------------------------------------------------------------------------------------------|----------------------|---------------------------------------------------------------------------------|
|                                  |                                                                                                           |                      |                                                                                 |
| Ávila Rivera, Maria Asunción     | Consorti Sanitari Integral, Hospital General de L'Hospitalet, L'Hospitalet de Llobregat, Barcelona, Spain | Site investigator/PI | Coordination at the center<br>Evaluation of participants and/or data management |
| Bernardo Lambrich, Noemí         | Hospital de Tortosa Verge de la Cinta (HTVC), Tortosa, Tarragona, Spain                                   | Site investigator    | Evaluation of participants and/or data management                               |
| Bejr-Kasem, Helena               | Hospital de Sant Pau, Barcelona, Spain                                                                    | Site investigator    | Evaluation of participants and/or data management                               |
| Blázquez Estrada, Marta          | Hospital Universitario Central de Asturias, Oviedo, Spain                                                 | Site investigator    | Evaluation of participants and/or data management                               |
| Botí González, Maria Ángeles     | Hospital Universitari Mutua de Terrassa, Terrassa, Barcelona, Spain                                       | Site investigator    | Neuropsychologist; evaluation of participants                                   |
| Borrué, Carmen                   | Hospital Infanta Sofía, Madrid, Spain                                                                     | Site investigator/PI | Coordination at the center<br>Evaluation of participants and/or data management |
| Buongiorno, Maria Teresa         | Hospital Universitari Mutua de Terrassa, Terrassa, Barcelona, Spain                                       | Site investigator    | Nurse study coordinator                                                         |
| Cabello González, Carolina       | Complejo Hospitalario de Navarra, Pamplona, Spain                                                         | Site investigator    | Scheduling of evaluations                                                       |
| Cabo López, Iria                 | Complejo Hospitalario Universitario de Pontevedra (CHOP), Pontevedra, Spain                               | Site investigator/PI | Coordination at the center<br>Evaluation of participants and/or data management |
| Caballol, Nuria                  | Consorti Sanitari Integral, Hospital Moisès Broggi, Sant Joan Despí, Barcelona, Spain.                    | Site investigator/PI | Coordination at the center<br>Evaluation of participants and/or data management |
| Cámara Lorenzo, Ana              | Hospital Clínic de Barcelona, Barcelona, Spain                                                            | Site investigator    | Nurse study coordinator                                                         |
| Canfield Medina, Héctor          | Complejo Hospitalario Universitario de Ferrol (CHUF), Ferrol, A Coruña, Spain                             | Site investigator    | Evaluation of participants and/or data management                               |
| Carrillo, Fátima                 | Hospital Universitario Virgen del Rocío, Sevilla, Spain                                                   | Site investigator    | Evaluation of participants and/or data management                               |
| Carrillo Padilla, Francisco José | Hospital Universitario de Canarias, San Cristóbal de la Laguna, Santa Cruz de Tenerife, Spain             | Site investigator/PI | Coordination at the center<br>Evaluation of participants and/or data management |
| Casas, Elena                     | Complejo Asistencial Universitario de Burgos, Burgos, Spain                                               | Site investigator    | Evaluation of participants and/or data management                               |
| Catalán, Maria José              | Hospital Universitario Clínico San Carlos, Madrid, Spain                                                  | Site investigator/PI | Coordination at the center<br>Evaluation of participants and/or data management |
| Clavero, Pedro                   | Complejo Hospitalario de Navarra, Pamplona, Spain                                                         | Site investigator    | Evaluation of participants and/or data management                               |
| Cortina Fernández, A             | Complejo Hospitalario Universitario de Ferrol (CHUF), Ferrol, A Coruña, Spain                             | Site investigator    | Coordination of blood extractions                                               |

|                            |                                                                                        |                                      |                                                                                 |
|----------------------------|----------------------------------------------------------------------------------------|--------------------------------------|---------------------------------------------------------------------------------|
|                            |                                                                                        |                                      |                                                                                 |
| Cosgaya, Marina            | Hospital Clínic de Barcelona, Barcelona, Spain                                         | Site investigator                    | Evaluation of participants and/or data management                               |
| Cots Foraster, Anna        | Institut d'Assistència Sanitària (IAS)—Institutuí<br>Cátala de la Salud. Girona, Spain | Site investigator                    | Evaluation of participants and/or data management                               |
| Crespo Cuevas, Ane         | Hospital del Mar, Barcelona, Spain.                                                    | Site investigator                    | Evaluation of participants and/or data management                               |
| Cubo, Esther               | Complejo Asistencial Universitario de Burgos,<br>Burgos, Spain                         | Site investigator/PI                 | Coordination at the center<br>Evaluation of participants and/or data management |
| De Deus Fonticoba, Teresa  | Complejo Hospitalario Universitario de Ferrol<br>(CHUF), Ferrol, A Coruña, Spain       | Site investigator                    | Nurse study coordinator<br>Evaluation of participants and/or data management    |
| De Fábregues-Boixar, Oriol | Hospital Universitario Vall d'Hebron, Barcelona, Spain                                 | Site investigator/PI                 | Coordination at the center<br>Evaluation of participants and/or data management |
| Díez Fairen, M             | Hospital Universitari Mutua de Terrassa, Terrassa, Barcelona, Spain                    | Site investigator                    | Evaluation of participants and/or data management                               |
| Dotor García-Soto, Julio   | Hospital Universitario Virgen Macarena, Sevilla, Spain                                 | Site investigator/PI                 | Evaluation of participants and/or data management                               |
| Erro, Elena                | Complejo Hospitalario de Navarra, Pamplona, Spain                                      | Site investigator                    | Evaluation of participants and/or data management                               |
| Escalante, Sonia           | Hospital de Tortosa Verge de la Cinta (HTVC),<br>Tortosa, Tarragona, Spain             | Site investigator/PI                 | Coordination at the center<br>Evaluation of participants and/or data management |
| Estelrich Peyret, Elena    | Institut d'Assistència Sanitària (IAS)—Institutuí<br>Cátala de la Salud. Girona, Spain | Site investigator                    | Evaluation of participants and/or data management                               |
| Fernández Guillán, Noelia  | Complejo Hospitalario Universitario de Ferrol<br>(CHUF), Ferrol, A Coruña, Spain       | Site investigator                    | Neuroimaging studies                                                            |
| Gámez, Pedro               | Complejo Asistencial Universitario de Burgos,<br>Burgos, Spain                         | Site investigator                    | Evaluation of participants and/or data management                               |
| Gallego, Mercedes          | Hospital La Princesa, Madrid, Spain                                                    | Site investigator                    | Evaluation of participants and/or data management                               |
| García Caldentey, Juan     | Centro Neurológico Oms 42, Palma de Mallorca, Spain                                    | Site investigator/PI                 | Coordination at the center<br>Evaluation of participants and/or data management |
| García Campos, Cristina    | Hospital Universitario Virgen Macarena, Sevilla, Spain                                 | Site investigator                    | Evaluation of participants and/or data management                               |
| García Díez, Cristina      | Complejo Hospitalario Universitario de Pontevedra (CHOP), Pontevedra, Spain            | Site investigator<br>(from May 2022) | neuropsychologist; evaluation of participants                                   |

|                                  |                                                                                               |                                     |                                                                                 |
|----------------------------------|-----------------------------------------------------------------------------------------------|-------------------------------------|---------------------------------------------------------------------------------|
|                                  |                                                                                               |                                     |                                                                                 |
| García Moreno, Jose Manuel       | Hospital Universitario Virgen Macarena, Sevilla, Spain                                        | Site investigator/PI (until MAR/21) | Coordination at the center<br>Evaluation of participants and/or data management |
| Gastón, Itziar                   | Complejo Hospitalario de Navarra, Pamplona, Spain                                             | Site investigator/PI                | Coordination at the center<br>Evaluation of participants and/or data management |
| Gómez Garre, María del Pilar     | Hospital Universitario Virgen del Rocío, Sevilla, Spain                                       | Site investigator                   | Genetic studies coordination                                                    |
| Gómez Mayordomo, Víctor          | Hospital Clínico San Carlos, Madrid, Spain                                                    | Site investigator                   | Evaluation of participants and/or data management                               |
| González Aloy, Javier            | Institut d'Assistència Sanitària (IAS)—Institutíu<br>Cátala de la Salut. Girona, Spain        | Site investigator                   | Evaluation of participants and/or data management                               |
| González Aramburu, Isabel        | Hospital Universitario Marqués de Valdecilla, Santander, Spain                                | Site investigator                   | Evaluation of participants and/or data management                               |
| González Ardura, Jessica         | Hospital Universitario Lucus Augusti (HULA), Lugo, Spain                                      | Site investigator/PI (until FEB/21) | Evaluation of participants and/or data management                               |
| González García, Beatriz         | Hospital La Princesa, Madrid, Spain                                                           | Site investigator                   | Nurse study coordinator                                                         |
| González Palmás, Maria Josefa    | Complejo Hospitalario Universitario de Pontevedra (CHOP), Pontevedra, Spain                   | Site investigator                   | Evaluation of participants and/or data management                               |
| González Toledo, Gabriel Ricardo | Hospital Universitario de Canarias, San Cristóbal de la Laguna, Santa Cruz de Tenerife, Spain | Site investigator                   | Evaluation of participants and/or data management                               |
| Golpe Díaz, Ana                  | Complejo Hospitalario Universitario de Ferrol (CHUF), Ferrol, A Coruña, Spain                 | Site investigator                   | Laboratory analysis coordination                                                |
| Grau Solá, Mireia                | Consorti Sanitari Integral, Hospital Moisès Broggi, Sant Joan Despí, Barcelona, Spain         | Site investigator                   | Evaluation of participants and/or data management                               |
| Guardia, Gemma                   | Hospital Universitari Mutua de Terrassa, Terrassa, Barcelona, Spain                           | Site investigator                   | Evaluation of participants and/or data management                               |
| Hernández Vara, Jorge            | Hospital Universitario Vall d'Hebron, Barcelona, Spain                                        | Site investigator/PI                | Coordination at the center<br>Evaluation of participants and/or data management |
| Horta Barba, Andrea              | Hospital de Sant Pau, Barcelona, Spain                                                        | Site investigator                   | Neuropsychologist; evaluation of participants                                   |
| Idoate Calderón, Daniel          | Complejo Hospitalario Universitario de Pontevedra (CHOP), Pontevedra, Spain                   | Site investigator (until May 2022)  | neuropsychologist; evaluation of participants                                   |
| Infante, Jon                     | Hospital Universitario Marqués de Valdecilla, Santander, Spain                                | Site investigator/PI                | Coordination at the center<br>Evaluation of participants and/or data management |
| Jesús, Silvia                    | Hospital Universitario Virgen del Rocío, Sevilla, Spain                                       | Site investigator                   | Evaluation of participants and/or data management                               |

|                                 |                                                                                             |                      |                                                                                 |
|---------------------------------|---------------------------------------------------------------------------------------------|----------------------|---------------------------------------------------------------------------------|
| <p> <a href="#"> </a> </p>      |                                                                                             |                      |                                                                                 |
| Kulisevsky, Jaime               | Hospital de Sant Pau, Barcelona, Spain                                                      | Site investigator/PI | Coordination at the center<br>Evaluation of participants and/or data management |
| Kurtis, Mónica                  | Hospital Ruber Internacional, Madrid, Spain                                                 | Site investigator/PI | Coordination at the center<br>Evaluation of participants and/or data management |
| Labandeira, Carmen              | Hospital Álvaro Cunqueiro, Complejo Hospitalario Universitario de Vigo (CHUVI), Vigo, Spain | Site investigator    | Evaluation of participants and/or data management                               |
| Labrador Espinosa, Miguel Ángel | Hospital Universitario Virgen del Rocío, Sevilla, Spain                                     | Site investigator    | Neuroimaging data analysis                                                      |
| Lacruz, Francisco               | Complejo Hospitalario de Navarra, Pamplona, Spain                                           | Site investigator    | Evaluation of participants and/or data management                               |
| Lage Castro, Melva              | Complejo Hospitalario Universitario de Pontevedra (CHOP), Pontevedra, Spain                 | Site investigator    | Evaluation of participants and/or data management                               |
| Lastres Gómez, Sonia            | Complejo Hospitalario Universitario de Pontevedra (CHOP), Pontevedra, Spain                 | Site investigator    | Neuropsychologist; evaluation of participants                                   |
| Legarda, Inés                   | Hospital Universitario Son Espases, Palma de Mallorca, Spain                                | Site investigator/PI | Coordination at the center<br>Evaluation of participants and/or data management |
| López Ariztegui, Nuria          | Complejo Hospitalario de Toledo, Toledo, Spain                                              | Site investigator/PI | Evaluation of participants and/or data management                               |
| López Díaz, Luis Manuel         | Hospital Da Costa de Burela, Lugo, Spain                                                    | Site investigator    | Evaluation of participants and/or data management                               |
| López Domínguez, Daniel         | Institut d'Assistència Sanitària (IAS)—Institutíu Càtala de la Salut. Girona, Spain         | Site investigator    | Evaluation of participants and/or data management                               |
| López Manzanares, Lydia         | Hospital La Princesa, Madrid, Spain                                                         | Site investigator/PI | Coordination at the center<br>Evaluation of participants and/or data management |
| López Seoane, Balbino           | Complejo Hospitalario Universitario de Ferrol (CHUF), Ferrol, A Coruña, Spain               | Site investigator    | Neuroimaging studies                                                            |
| Lucas del Pozo, Sara            | Hospital Universitario Vall d'Hebron, Barcelona, Spain                                      | Site investigator    | Evaluation of participants and/or data management                               |
| Macías, Yolanda                 | Fundación Hospital de Alcorcón, Madrid, Spain                                               | Site investigator    | Evaluation of participants and/or data management                               |
| Mata, Marina                    | Hospital Infanta Sofía, Madrid, Spain                                                       | Site investigator    | Evaluation of participants and/or data management                               |
| Martí Andres, Gloria            | Hospital Universitario Vall d'Hebron, Barcelona, Spain                                      | Site investigator    | Evaluation of participants and/or data management                               |
| Martí, Maria José               | Hospital Clínic de Barcelona, Barcelona, Spain                                              | Site investigator/PI | Coordination at the center<br>Evaluation of participants and/or                 |

|                                 |                                                                                               |                                                  |                                                                                                    |
|---------------------------------|-----------------------------------------------------------------------------------------------|--------------------------------------------------|----------------------------------------------------------------------------------------------------|
|                                 |                                                                                               |                                                  |                                                                                                    |
|                                 |                                                                                               |                                                  |                                                                                                    |
|                                 |                                                                                               |                                                  |                                                                                                    |
|                                 |                                                                                               |                                                  |                                                                                                    |
| Martínez Castrillo, Juan Carlos | Hospital Universitario Ramón y Cajal, Madrid, Spain                                           | Site investigator /PI                            | data management<br>Coordination at the center<br>Evaluation of participants and/or data management |
| Martinez-Martin, Pablo          | Centro Nacional de Epidemiología y CIBERNED, Instituto de Salud Carlos III. Madrid            | Collaborator in statistical and methods analysis | Methods and statistical reviewer                                                                   |
| McAfee, Darrian                 | University of Pennsylvania, Philadelphia                                                      | Collaborator of English style                    | English style reviewer                                                                             |
| Meitín, Maria Teresa            | Hospital Da Costa de Burela, Lugo, Spain                                                      | Site investigator                                | Evaluation of participants and/or data management                                                  |
| Menéndez González, Manuel       | Hospital Universitario Central de Asturias, Oviedo, Spain                                     | Site investigator/PI                             | Coordination at the center<br>Evaluation of participants and/or data management                    |
| Méndez del Barrio, Carlota      | Hospital Universitario Virgen del Rocío, Sevilla, Spain                                       | Site investigator                                | Evaluation of participants and/or data management                                                  |
| Mendoza Plasencia, Zebenzui     | Hospital Universitario de Canarias, San Cristóbal de la Laguna, Santa Cruz de Tenerife, Spain | Site investigator                                | Evaluation of participants and/or data management                                                  |
| Mir, Pablo                      | Hospital Universitario Virgen del Rocío, Sevilla, Spain                                       | Site investigator/PI                             | Coordination at the center<br>Evaluation of participants and/or data management                    |
| Miranda Santiago, Javier        | Complejo Asistencial Universitario de Burgos, Burgos, Spain                                   | Site investigator                                | Evaluation of participants and/or data management                                                  |
| Morales Casado, Maria Isabel    | Complejo Hospitalario de Toledo, Toledo, Spain.                                               | Site investigator                                | Evaluation of participants and/or data management                                                  |
| Moreno Diéguez, Antonio         | Complejo Hospitalario Universitario de Ferrol (CHUF), Ferrol, A Coruña, Spain                 | Site investigator                                | Neuroimaging studies                                                                               |
| Nogueira, Víctor                | Hospital Da Costa de Burela, Lugo, Spain                                                      | Site investigator/PI                             | Coordination at the center<br>Evaluation of participants and/or data management                    |
| Novo Amado, Alba                | Complejo Hospitalario Universitario de Ferrol (CHUF), Ferrol, A Coruña, Spain                 | Site investigator                                | Neuroimaging studies                                                                               |
| Novo Ponte, Sabela              | Hospital Universitario Puerta de Hierro, Madrid, Spain.                                       | Site investigator                                | Evaluation of participants and/or data management                                                  |
| Ordás, Carlos                   | Hospital Rey Juan Carlos, Madrid, Spain, Madrid, Spain.                                       | Site Investigator                                | Evaluation of participants and/or data management                                                  |
| Pagonabarraga, Javier           | Hospital de Sant Pau, Barcelona, Spain                                                        | Site investigator                                | Evaluation of participants and/or data management                                                  |

|                               |                                                                                               |                                  |                                                                                 |
|-------------------------------|-----------------------------------------------------------------------------------------------|----------------------------------|---------------------------------------------------------------------------------|
|                               |                                                                                               |                                  |                                                                                 |
| Pareés, Isabel                | Hospital Ruber Internacional, Madrid, Spain                                                   | Site investigator                | Evaluation of participants and/or data management                               |
| Pascual-Sedano, Berta         | Hospital de Sant Pau, Barcelona, Spain                                                        | Site Investigator                | Evaluation of participants and/or data management                               |
| Pastor, Pau                   | Hospital Universitari Mutua de Terrassa, Terrassa, Barcelona, Spain                           | Site investigator                | Evaluation of participants and/or data management                               |
| Pérez Fuertes, Aída           | Complejo Hospitalario Universitario de Ferrol (CHUF), Ferrol, A Coruña, Spain                 | Site investigator                | Blood analysis                                                                  |
| Pérez Noguera, Rafael         | Hospital Universitario Virgen Macarena, Sevilla, Spain                                        | Site investigator                | Evaluation of participants and/or data management                               |
| Planas-Ballvé, Ana            | Consorti Sanitari Integral, Hospital Moisès Broggi, Sant Joan Despí, Barcelona, Spain         | Site investigator                | Evaluation of participants and/or data management                               |
| Planellas, Lluís              | Hospital Clínic de Barcelona, Barcelona, Spain                                                | Site investigator (until DEC/19) | Evaluation of participants and/or data management                               |
| Prats, Marian Ángeles         | Institut d'Assistència Sanitària (IAS)—Institutí CÀtala de la Salut. Girona, Spain            | Site investigator                | Evaluation of participants and/or data management                               |
| Prieto Jurczynska, Cristina   | Hospital Rey Juan Carlos, Madrid, Spain, Madrid, Spain                                        | Site investigator/PI             | Coordination at the center<br>Evaluation of participants and/or data management |
| Puente, Víctor                | Hospital del Mar, Barcelona, Spain                                                            | Site investigator/PI             | Coordination at the center<br>Evaluation of participants and/or data management |
| Pueyo Morlans, Mercedes       | Hospital Universitario de Canarias, San Cristóbal de la Laguna, Santa Cruz de Tenerife, Spain | Site investigator                | Evaluation of participants and/or data management                               |
| Puig Daví, Arnau              | Hospital de Sant Pau, Barcelona, Spain                                                        | Site investigator                | Evaluation of participants and/or data management                               |
| Redondo, Nuria                | Hospital La Princesa, Madrid, Spain                                                           | Site Investigator                | Evaluation of participants and/or data management                               |
| Rodríguez Méndez, Luisa       | Complejo Hospitalario Universitario de Ferrol (CHUF), Ferrol, A Coruña, Spain                 | Site investigator                | Blood analysis                                                                  |
| Rodríguez Pérez, Amparo Belén | Hospital General Universitario de Elche, Elche, Spain                                         | Site investigator                | Evaluation of participants and/or data management                               |
| Roldán, Florinda              | Hospital Universitario Virgen del Rocío, Sevilla, Spain                                       | Site investigator                | Neuroimaging studies                                                            |
| Ruíz de Arcos, María          | Hospital Universitario Virgen Macarena, Sevilla, Spain.                                       | Site investigator                | Evaluation of participants and/or data management                               |
| Ruíz Martínez, Javier         | Hospital Universitario Donostia, San Sebastián, Spain                                         | Site investigator                | Evaluation of participants and/or data management                               |

|                                  |                                                                                      |                            |                                                                                 |
|----------------------------------|--------------------------------------------------------------------------------------|----------------------------|---------------------------------------------------------------------------------|
|                                  |                                                                                      |                            |                                                                                 |
| Sánchez Alonso, Pilar            | Hospital Universitario Puerta de Hierro, Madrid, Spain                               | Site investigator          | Evaluation of participants and/or data management                               |
| Sánchez-Carpintero, Macarena     | Complejo Hospitalario Universitario de Ferrol (CHUF), Ferrol, A Coruña, Spain        | Site investigator          | Neuroimaging studies                                                            |
| Sánchez Díez, Gema               | Hospital Universitario Ramón y Cajal, Madrid, Spain                                  | Site investigator          | Evaluation of participants and/or data management                               |
| Sánchez Rodríguez, Antonio       | Hospital Universitario Marqués de Valdecilla, Santander, Spain                       | Site investigator          | Evaluation of participants and/or data management                               |
| Santacruz, Pilar                 | Hospital Clínic de Barcelona, Barcelona, Spain                                       | Site investigator          | Evaluation of participants and/or data management                               |
| Santos García, Diego             | CHUAC, Complejo Hospitalario Universitario de A Coruña                               | Coordinator of the Project | Coordination of the COPPADIS-2015                                               |
| Segundo Rodríguez, José Clemente | Complejo Hospitalario de Toledo, Toledo, Spain                                       | Site investigator          | Evaluation of participants and/or data management                               |
| Seijo, Manuel                    | Complejo Hospitalario Universitario de Pontevedra (CHOP), Pontevedra, Spain          | Site investigator/PI       | Coordination at the center<br>Evaluation of participants and/or data management |
| Sierra, María                    | Hospital Universitario Marqués de Valdecilla, Santander, Spain                       | Site investigator          | Evaluation of participants and/or data management                               |
| Solano, Berta                    | Institut d'Assistència Sanitària (IAS)—Institutíu C  tala de la Salut. Girona, Spain | Site investigator/PI       | Coordination at the center<br>Evaluation of participants and/or data management |
| Su  rez Castro, Ester            | Complejo Hospitalario Universitario de Ferrol (CHUF), Ferrol, A Coru  a, Spain       | Site investigator          | Evaluation of participants and/or data management                               |
| Tartari, Juan Pablo              | Hospital Universitari Mutua de Terrassa, Terrassa, Barcelona, Spain                  | Site investigator          | Evaluation of participants and/or data management                               |
| Valero, Caridad                  | Hospital Arnau de Vilanova, Valencia, Spain                                          | Site investigator          | Evaluation of participants and/or data management                               |
| Vargas, Laura                    | Hospital Universitario Virgen del Roc  o, Sevilla, Spain                             | Site investigator          | Evaluation of participants and/or data management                               |
| Vela, Lydia                      | Fundaci  n Hospital de Alcorc  n, Madrid, Spain                                      | Site investigator/PI       | Coordination at the center<br>Evaluation of participants and/or data management |
| Villanueva, Clara                | Hospital Universitario Cl  nico San Carlos, Madrid, Spain                            | Site investigator          | Evaluation of participants and/or data management                               |
| Vives, B  rbara                  | Hospital Universitario Son Espases, Palma de Mallorca, Spain                         | Site investigator          | Evaluation of participants and/or data management                               |
